# Supplementary material for: Metagenomes of a Freshwater Charavirus from British Columbia Provide a Window into Ancient Lineages of Viruses
Source: MDPI journal article supplement (doi:10.3390/v11030299), 2019-03-25

Supplementary Table 1 – Mean Pairwise Patristic Distances of Selected Nodes.

| RdRps | Viruses compared       | Number of comparisons | Mean (s/s) | Stdev  | Mya   |
|-------|------------------------|-----------------------|------------|--------|-------|
| CPs   | Chara x Charaviruses   | 1x1                   | 0.3495     |        | 46.5  |
|       | Tobamo x Tobamoviruses | 2x6                   | 0.9780     | 0.0612 | 130   |
|       | Beny x Benyviruses     | 1x4                   | 0.7970     | 0.0312 | 105.9 |
|       | Chara x Benyviruses    | 2x5                   | 2.9823     | 0.1172 | 396.4 |
|       | Chara x Tobamoviruses  | 2x8                   | 6.5583     | 0.1031 | 871.7 |
|       | Beny x Tobamoviruses   | 5x8                   | 6.8087     | 0.1963 | 905.0 |
| CPs   | Chara x Charaviruses   | 1x1                   | 0.4684     |        | 28.7  |
|       | Tobamo x Tobamoviruses | 1x7                   | 2.1217     | 0.1926 | 130   |
|       | Tobamo x Charaviruses  | 2x8                   | 3.4671     | 0.2394 | 212.4 |

Distances for the CPs were derived from the taxonomy shown in Figures 2 and 3.

Supplementary figure 1: Single nucleotide variants in the helicase (A), movement (B) and capsid (C) proteins of the CV-Can genome in protected and urban watersheds.

A)

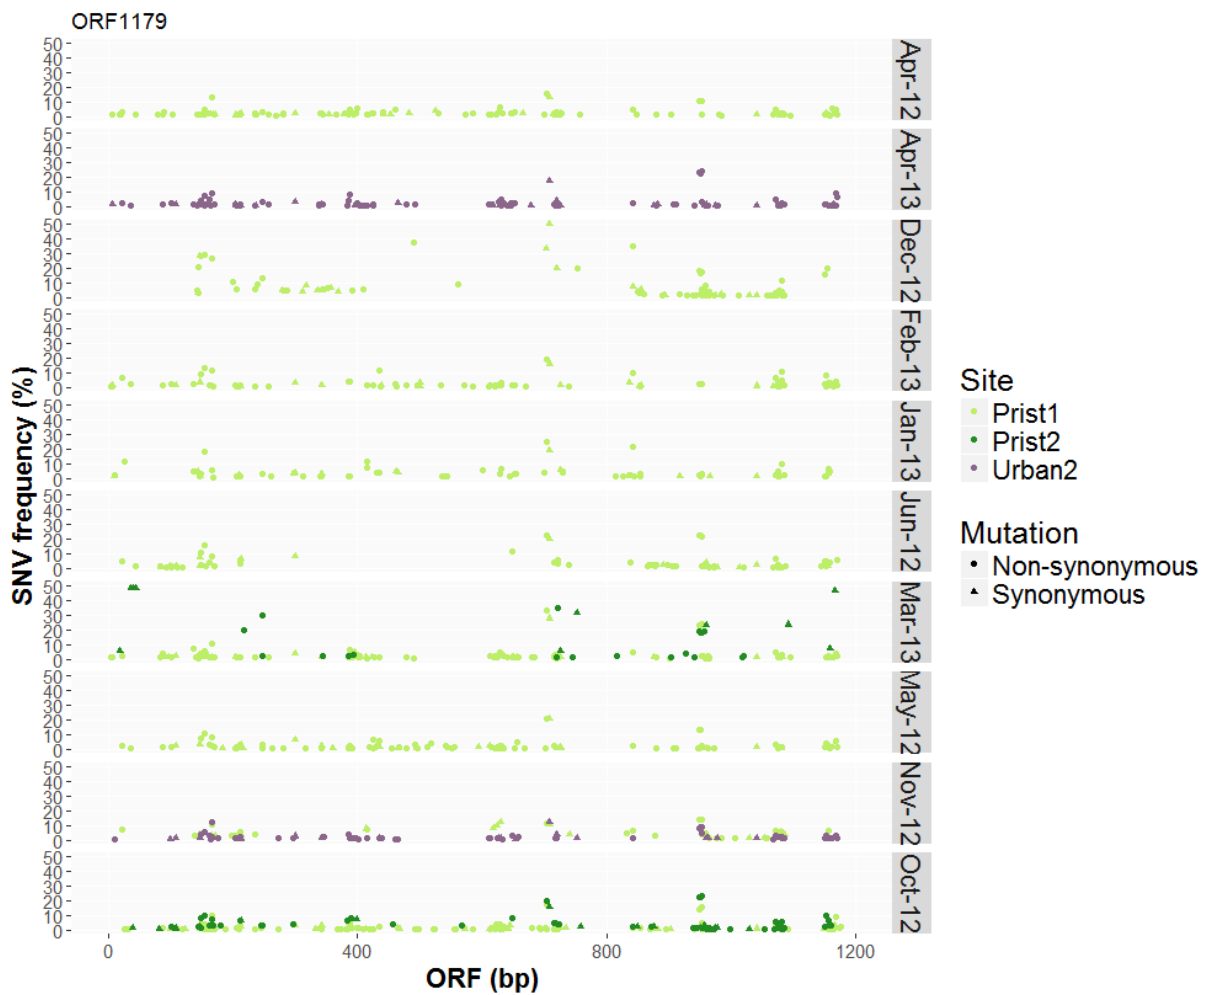

B)

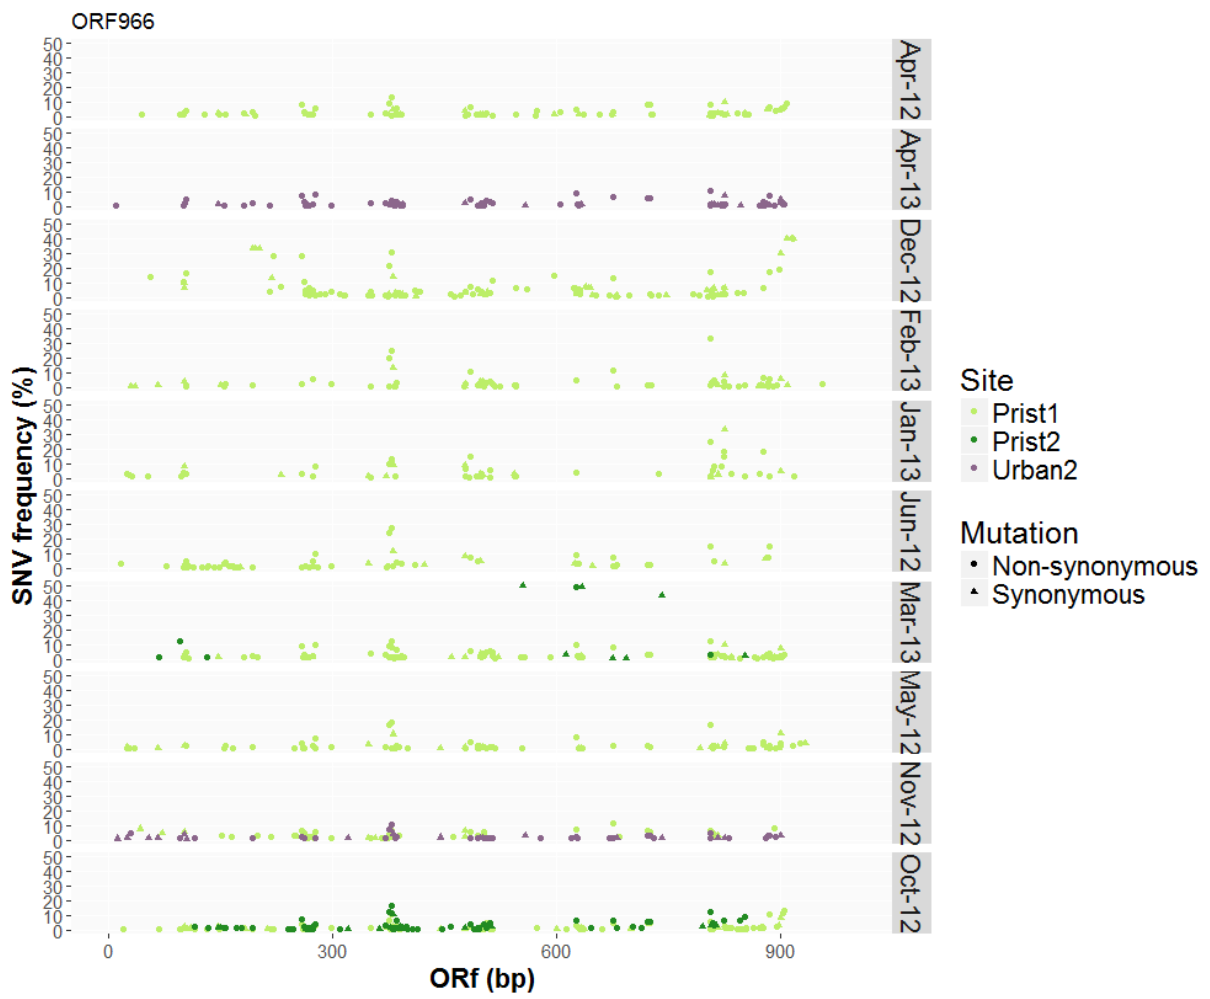

C)

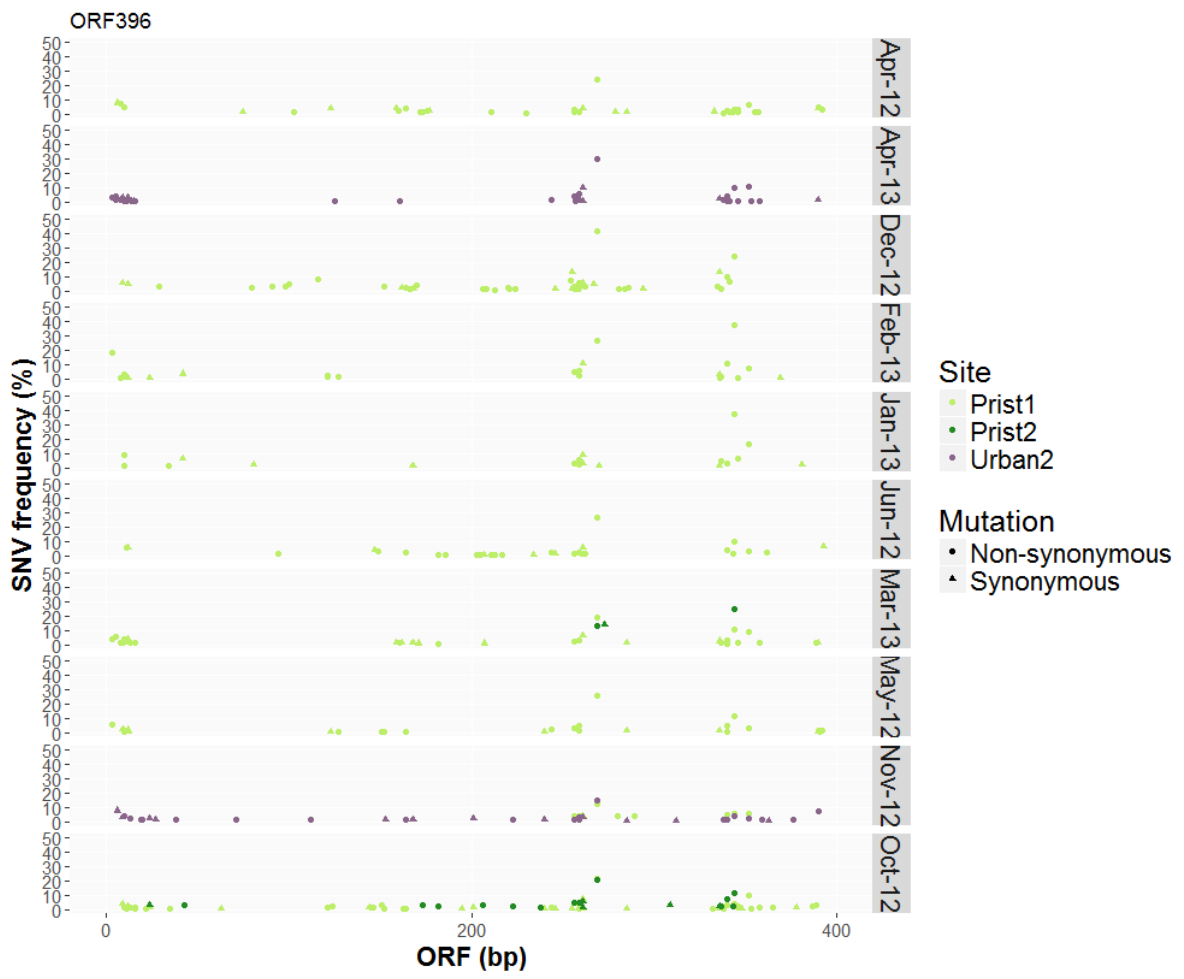

Supplement: s1 [file s1]
